# Supplementary material for: Large-Scale Gene Relocations following an Ancient Genome Triplication Associated with the Diversification of Core Eudicots
Source: PLoS One. 2016 May 19;11(5):e0155637. doi: 10.1371/journal.pone.0155637 (PMC4873151; doi:10.1371/journal.pone.0155637)
Supplement: S1 Table — (XLSX) [file pone.0155637.s003.xlsx]

## Sheet: Sheet1
Gene symbol	Origin
AT1G01010	Alpha WGD
AT1G01020	Alpha WGD
AT1G01030	Beta WGD
AT1G01040	Relocated gamma
AT1G01050	Beta WGD
AT1G01060	Beta WGD
AT1G01070	Alpha WGD
AT1G01080	Relocated gamma
AT1G01090	Relocated gamma
AT1G01100	Alpha WGD
AT1G01110	Alpha WGD
AT1G01120	Beta WGD
AT1G01130	Relocated gamma
AT1G01140	Relocated gamma
AT1G01150	Transposed
AT1G01160	Alpha WGD
AT1G01170	Alpha WGD
AT1G01190	Beta WGD
AT1G01200	Relocated gamma
AT1G01210	Relocated gamma
AT1G01225	Relocated gamma
AT1G01230	Relocated gamma
AT1G01240	Beta WGD
AT1G01260	Beta WGD
AT1G01280	Relocated gamma
AT1G01300	Beta WGD
AT1G01320	Relocated gamma
AT1G01340	Beta WGD
AT1G01350	Alpha WGD
AT1G01355	Transposed
AT1G01360	Alpha WGD
AT1G01370	Relocated gamma
AT1G01380	Beta WGD
AT1G01390	Alpha WGD
AT1G01410	Transposed
AT1G01420	Proximal
AT1G01430	Alpha WGD
AT1G01440	Beta WGD
AT1G01450	Relocated gamma
AT1G01455	Alpha WGD
AT1G01460	Alpha WGD
AT1G01470	Beta WGD
AT1G01480	Beta WGD
AT1G01520	Alpha WGD
AT1G01530	Transposed
AT1G01540	Alpha WGD
AT1G01550	Beta WGD
AT1G01560	Beta WGD
AT1G01570	Alpha WGD
AT1G01580	Tandem
AT1G01590	Tandem
AT1G01600	Beta WGD
AT1G01610	Alpha WGD
AT1G01620	Beta WGD
AT1G01650	Relocated gamma
AT1G01660	Beta WGD
AT1G01670	Beta WGD
AT1G01680	Beta WGD
AT1G01690	Alpha WGD
AT1G01700	Beta WGD
AT1G01710	Alpha WGD
AT1G01725	Relocated gamma
AT1G01740	Alpha WGD
AT1G01750	Alpha WGD
AT1G01780	Beta WGD
AT1G01790	Alpha WGD
AT1G01800	Beta WGD
AT1G01820	Beta WGD
AT1G01830	Beta WGD
AT1G01860	Relocated gamma
AT1G01880	Relocated gamma
AT1G01900	Relocated gamma
AT1G01910	Relocated gamma
AT1G01950	Relocated gamma
AT1G01960	Beta WGD
AT1G01970	Relocated gamma
AT1G01980	Transposed
AT1G02000	Beta WGD
AT1G02010	Relocated gamma
AT1G02030	Beta WGD
AT1G02050	Alpha WGD
AT1G02060	Transposed
AT1G02070	Beta WGD
AT1G02110	Beta WGD
AT1G02150	Relocated gamma
AT1G02170	Relocated gamma
AT1G02190	Tandem
AT1G02205	Tandem
AT1G02210	Proximal
AT1G02220	Tandem
AT1G02230	Tandem
AT1G02250	Tandem
AT1G02270	Relocated gamma
AT1G02280	Relocated gamma
AT1G02290	Relocated gamma
AT1G02300	Alpha WGD
AT1G02305	Tandem
AT1G02335	Relocated gamma
AT1G02350	Alpha WGD
AT1G02360	Alpha WGD
AT1G02370	Alpha WGD
AT1G02380	Alpha WGD
AT1G02390	Alpha WGD
AT1G02400	Relocated gamma
AT1G02430	Beta WGD
AT1G02440	Beta WGD
AT1G02460	Alpha WGD
AT1G02470	Tandem
AT1G02475	Alpha WGD
AT1G02500	Alpha WGD
AT1G02510	Alpha WGD
AT1G02520	Beta WGD
AT1G02530	Beta WGD
AT1G02550	Beta WGD
AT1G02560	Relocated gamma
AT1G02570	Beta WGD
AT1G02575	Tandem
AT1G02580	Alpha WGD
AT1G02590	Transposed
AT1G02610	Alpha WGD
AT1G02620	Alpha WGD
AT1G02650	Beta WGD
AT1G02660	Beta WGD
AT1G02670	Transposed
AT1G02685	Alpha WGD
AT1G02690	Alpha WGD
AT1G02700	Alpha WGD
AT1G02720	Beta WGD
AT1G02730	Relocated gamma
AT1G02750	Alpha WGD
AT1G02770	Transposed
AT1G02780	Alpha WGD
AT1G02790	Relocated gamma
AT1G02800	Alpha WGD
AT1G02810	Beta WGD
AT1G02813	Alpha WGD
AT1G02816	Alpha WGD
AT1G02820	Alpha WGD
AT1G02840	Alpha WGD
AT1G02890	Alpha WGD
AT1G02900	Relocated gamma
AT1G02910	Relocated gamma
AT1G02920	Beta WGD
AT1G02930	Beta WGD
AT1G02940	Beta WGD
AT1G02950	Tandem
AT1G02960	Tandem
AT1G02965	Tandem
AT1G02970	Relocated gamma
AT1G02980	Alpha WGD
AT1G02990	Beta WGD
AT1G03000	Relocated gamma
AT1G03010	Beta WGD
AT1G03020	Beta WGD
AT1G03040	Alpha WGD
AT1G03050	Alpha WGD
AT1G03055	Relocated gamma
AT1G03060	Alpha WGD
AT1G03070	Alpha WGD
AT1G03080	Alpha WGD
AT1G03090	Relocated gamma
AT1G03100	Relocated gamma
AT1G03103	Relocated gamma
AT1G03120	Relocated gamma
AT1G03130	Alpha WGD
AT1G03140	Relocated gamma
AT1G03150	Relocated gamma
AT1G03170	Alpha WGD
AT1G03200	Proximal
AT1G03210	Alpha WGD
AT1G03220	Tandem
AT1G03230	Tandem
AT1G03240	Proximal
AT1G03260	Relocated gamma
AT1G03270	Relocated gamma
AT1G03290	Alpha WGD
AT1G03300	Transposed
AT1G03310	Relocated gamma
AT1G03340	Alpha WGD
AT1G03350	Relocated gamma
AT1G03370	Alpha WGD
AT1G03380	Relocated gamma
AT1G03400	Tandem
AT1G03410	Tandem
AT1G03430	Relocated gamma
AT1G03440	Alpha WGD
AT1G03445	Alpha WGD
AT1G03457	Alpha WGD
AT1G03470	Alpha WGD
AT1G03495	Relocated gamma
AT1G03510	Relocated gamma
AT1G03520	Alpha WGD
AT1G03540	Relocated gamma
AT1G03550	Relocated gamma
AT1G03560	Relocated gamma
AT1G03590	Relocated gamma
AT1G03610	Alpha WGD
AT1G03620	Relocated gamma
AT1G03660	Tandem
AT1G03670	Alpha WGD
AT1G03680	Alpha WGD
AT1G03700	Alpha WGD
AT1G03730	Alpha WGD
AT1G03740	Alpha WGD
AT1G03750	Relocated gamma
AT1G03770	Alpha WGD
AT1G03780	Alpha WGD
AT1G03790	Alpha WGD
AT1G03800	Alpha WGD
AT1G03810	Relocated gamma
AT1G03830	Relocated gamma
AT1G03840	Alpha WGD
AT1G03850	Relocated gamma
AT1G03860	Alpha WGD
AT1G03870	Alpha WGD
AT1G03880	Alpha WGD
AT1G03890	Tandem
AT1G03900	Relocated gamma
AT1G03905	Alpha WGD
AT1G03920	Beta WGD
AT1G03930	Beta WGD
AT1G03950	Relocated gamma
AT1G03960	Alpha WGD
AT1G03970	Alpha WGD
AT1G03980	Alpha WGD
AT1G03982	Relocated gamma
AT1G03990	Beta WGD
AT1G04000	Beta WGD
AT1G04010	Relocated gamma
AT1G04020	Relocated gamma
AT1G04030	Alpha WGD
AT1G04040	Alpha WGD
AT1G04050	Alpha WGD
AT1G04070	Alpha WGD
AT1G04080	Relocated gamma
AT1G04090	Alpha WGD
AT1G04100	Relocated gamma
AT1G04110	Relocated gamma
AT1G04120	Relocated gamma
AT1G04130	Relocated gamma
AT1G04140	Alpha WGD
AT1G04150	Relocated gamma
AT1G04160	Alpha WGD
AT1G04180	Alpha WGD
AT1G04190	Relocated gamma
AT1G04210	Relocated gamma
AT1G04220	Alpha WGD
AT1G04230	Alpha WGD
AT1G04240	Beta WGD
AT1G04250	Beta WGD
AT1G04260	Relocated gamma
AT1G04270	Alpha WGD
AT1G04300	Alpha WGD
AT1G04310	Beta WGD
AT1G04330	Beta WGD
AT1G04340	Beta WGD
AT1G04350	Alpha WGD
AT1G04360	Alpha WGD
AT1G04370	Beta WGD
AT1G04380	Proximal
AT1G04400	Relocated gamma
AT1G04410	Alpha WGD
AT1G04420	Relocated gamma
AT1G04430	Beta WGD
AT1G04440	Beta WGD
AT1G04450	Alpha WGD
AT1G04460	Alpha WGD
AT1G04470	Alpha WGD
AT1G04480	Alpha WGD
AT1G04490	Alpha WGD
AT1G04500	Alpha WGD
AT1G04510	Alpha WGD
AT1G04520	Alpha WGD
AT1G04540	Alpha WGD
AT1G04550	Alpha WGD
AT1G04570	Alpha WGD
AT1G04580	Transposed
AT1G04600	Alpha WGD
AT1G04610	Alpha WGD
AT1G04625	Transposed
AT1G04630	Alpha WGD
AT1G04640	Transposed
AT1G04645	Relocated gamma
AT1G04680	Relocated gamma
AT1G04700	Relocated gamma
AT1G04710	Alpha WGD
AT1G04750	Alpha WGD
AT1G04760	Alpha WGD
AT1G04770	Relocated gamma
AT1G04810	Alpha WGD
AT1G04820	Transposed
AT1G04830	Relocated gamma
AT1G04840	Relocated gamma
AT1G04850	Relocated gamma
AT1G04860	Alpha WGD
AT1G04870	Transposed
AT1G04880	Relocated gamma
AT1G04890	Relocated gamma
AT1G04930	Alpha WGD
AT1G04940	Tandem
AT1G04945	Tandem
AT1G04950	Relocated gamma
AT1G04970	Relocated gamma
AT1G04980	Alpha WGD
AT1G04990	Alpha WGD
AT1G05000	Alpha WGD
AT1G05010	Relocated gamma
AT1G05020	Relocated gamma
AT1G05030	Relocated gamma
AT1G05070	Alpha WGD
AT1G05080	Transposed
AT1G05090	Relocated gamma
AT1G05100	Alpha WGD
AT1G05120	Relocated gamma
AT1G05140	Alpha WGD
AT1G05150	Alpha WGD
AT1G05160	Alpha WGD
AT1G05170	Alpha WGD
AT1G05180	Alpha WGD
AT1G05190	Relocated gamma
AT1G05200	Alpha WGD
AT1G05210	Alpha WGD
AT1G05220	Tandem
AT1G05230	Alpha WGD
AT1G05240	Tandem
AT1G05250	Tandem
AT1G05260	Beta WGD
AT1G05270	Alpha WGD
AT1G05280	Beta WGD
AT1G05290	Alpha WGD
AT1G05291	Relocated gamma
AT1G05300	Alpha WGD
AT1G05320	Alpha WGD
AT1G05340	Alpha WGD
AT1G05360	Beta WGD
AT1G05370	Beta WGD
AT1G05380	Beta WGD
AT1G05400	Transposed
AT1G05410	Beta WGD
AT1G05420	Alpha WGD
AT1G05450	Transposed
AT1G05460	Relocated gamma
AT1G05470	Alpha WGD
AT1G05520	Transposed
AT1G05530	Proximal
AT1G05540	Tandem
AT1G05550	Tandem
AT1G05560	Proximal
AT1G05570	Alpha WGD
AT1G05575	Alpha WGD
AT1G05580	Alpha WGD
AT1G05615	Transposed
AT1G05630	Alpha WGD
AT1G05640	Alpha WGD
AT1G05650	Tandem
AT1G05660	Tandem
AT1G05670	Alpha WGD
AT1G05675	Tandem
AT1G05680	Alpha WGD
AT1G05710	Alpha WGD
AT1G05730	Alpha WGD
AT1G05740	Tandem
AT1G05760	Tandem
AT1G05770	Tandem
AT1G05780	Alpha WGD
AT1G05785	Relocated gamma
AT1G05800	Alpha WGD
AT1G05810	Alpha WGD
AT1G05830	Alpha WGD
AT1G05860	Alpha WGD
AT1G05870	Alpha WGD
AT1G05880	Alpha WGD
AT1G05890	Alpha WGD
AT1G05894	Relocated gamma
AT1G05900	Alpha WGD
AT1G05910	Relocated gamma
AT1G05930	Transposed
AT1G05940	Transposed
AT1G05960	Relocated gamma
AT1G05990	Relocated gamma
AT1G06020	Alpha WGD
AT1G06030	Tandem
AT1G06040	Alpha WGD
AT1G06050	Relocated gamma
AT1G06070	Alpha WGD
AT1G06080	Alpha WGD
AT1G06090	Tandem
AT1G06100	Tandem
AT1G06120	Proximal
AT1G06130	Alpha WGD
AT1G06135	Tandem
AT1G06137	Tandem
AT1G06150	Alpha WGD
AT1G06160	Alpha WGD
AT1G06170	Alpha WGD
AT1G06180	Alpha WGD
AT1G06200	Alpha WGD
AT1G06230	Relocated gamma
AT1G06240	Relocated gamma
AT1G06250	Alpha WGD
AT1G06290	Tandem
AT1G06310	Tandem
AT1G06330	Relocated gamma
AT1G06350	Tandem
AT1G06360	Tandem
AT1G06390	Alpha WGD
AT1G06410	Relocated gamma
AT1G06430	Relocated gamma
AT1G06490	Relocated gamma
AT1G06540	Alpha WGD
AT1G06550	Relocated gamma
AT1G06580	Relocated gamma
AT1G06620	Proximal
AT1G06630	Transposed
AT1G06640	Alpha WGD
AT1G06645	Tandem
AT1G06650	Tandem
AT1G06660	Alpha WGD
AT1G06670	Alpha WGD
AT1G06680	Alpha WGD
AT1G06690	Relocated gamma
AT1G06700	Alpha WGD
AT1G06710	Transposed
AT1G06730	Relocated gamma
AT1G06740	Alpha WGD
AT1G06750	Alpha WGD
AT1G06760	Alpha WGD
AT1G06765	Alpha WGD
AT1G06770	Alpha WGD
AT1G06780	Relocated gamma
AT1G06800	Alpha WGD
AT1G06810	Transposed
AT1G06830	Alpha WGD
AT1G06840	Relocated gamma
AT1G06850	Relocated gamma
AT1G06870	Alpha WGD
AT1G06890	Alpha WGD
AT1G06900	Relocated gamma
AT1G06920	Alpha WGD
AT1G06923	Alpha WGD
AT1G06925	Transposed
AT1G06960	Alpha WGD
AT1G06970	Alpha WGD
AT1G06980	Alpha WGD
AT1G06990	Alpha WGD
AT1G07000	Relocated gamma
AT1G07010	Relocated gamma
AT1G07025	Alpha WGD
AT1G07030	Gamma WGD
AT1G07050	Relocated gamma
AT1G07070	Gamma WGD
AT1G07090	Relocated gamma
AT1G07140	Alpha WGD
AT1G07150	Alpha WGD
AT1G07160	Gamma WGD
AT1G07170	Alpha WGD
AT1G07175	Alpha WGD
AT1G07180	Alpha WGD
AT1G07200	Gamma WGD
AT1G07220	Relocated gamma
AT1G07230	Relocated gamma
AT1G07240	Alpha WGD
AT1G07250	Alpha WGD
AT1G07260	Tandem
AT1G07270	Alpha WGD
AT1G07280	Beta WGD
AT1G07290	Relocated gamma
AT1G07300	Alpha WGD
AT1G07310	Relocated gamma
AT1G07330	Beta WGD
AT1G07360	Alpha WGD
AT1G07370	Alpha WGD
AT1G07380	Gamma WGD
AT1G07390	Gamma WGD
AT1G07400	Alpha WGD
AT1G07410	Beta WGD
AT1G07420	Alpha WGD
AT1G07430	Beta WGD
AT1G07440	Alpha WGD
AT1G07460	Alpha WGD
AT1G07470	Beta WGD
AT1G07473	Tandem
AT1G07476	Tandem
AT1G07480	Beta WGD
AT1G07490	Relocated gamma
AT1G07510	Alpha WGD
AT1G07520	Gamma WGD
AT1G07530	Gamma WGD
AT1G07540	Gamma WGD
AT1G07550	Beta WGD
AT1G07560	Beta WGD
AT1G07570	Gamma WGD
AT1G07590	Relocated gamma
AT1G07615	Relocated gamma
AT1G07620	Relocated gamma
AT1G07630	Alpha WGD
AT1G07640	Gamma WGD
AT1G07660	Gamma WGD
AT1G07705	Beta WGD
AT1G07710	Relocated gamma
AT1G07720	Alpha WGD
AT1G07730	Gamma WGD
AT1G07740	Relocated gamma
AT1G07745	Relocated gamma
AT1G07747	Transposed
AT1G07750	Alpha WGD
AT1G07770	Gamma WGD
AT1G07780	Transposed
AT1G07790	Gamma WGD
AT1G07795	Relocated gamma
AT1G07820	Gamma WGD
AT1G07850	Gamma WGD
AT1G07860	Tandem
AT1G07870	Beta WGD
AT1G07880	Beta WGD
AT1G07900	Gamma WGD
AT1G07920	Tandem
AT1G07930	Tandem
AT1G07940	Beta WGD
AT1G07950	Transposed
AT1G07990	Beta WGD
AT1G08000	Gamma WGD
AT1G08005	Proximal
AT1G08010	Gamma WGD
AT1G08040	Alpha WGD
AT1G08050	Gamma WGD
AT1G08060	Alpha WGD
AT1G08065	Alpha WGD
AT1G08080	Proximal
AT1G08090	Beta WGD
AT1G08100	Beta WGD
AT1G08110	Relocated gamma
AT1G08120	Transposed
AT1G08125	Relocated gamma
AT1G08130	Relocated gamma
AT1G08135	Tandem
AT1G08140	Tandem
AT1G08150	Alpha WGD
AT1G08160	Relocated gamma
AT1G08170	Gamma WGD
AT1G08200	Alpha WGD
AT1G08210	Gamma WGD
AT1G08230	Gamma WGD
AT1G08250	Alpha WGD
AT1G08260	Relocated gamma
AT1G08270	Relocated gamma
AT1G08290	Relocated gamma
AT1G08310	Relocated gamma
AT1G08320	Relocated gamma
AT1G08340	Alpha WGD
AT1G08350	Relocated gamma
AT1G08360	Alpha WGD
AT1G08410	Alpha WGD
AT1G08420	Gamma WGD
AT1G08430	Tandem
AT1G08440	Alpha WGD
AT1G08460	Relocated gamma
AT1G08465	Relocated gamma
AT1G08470	Relocated gamma
AT1G08530	Relocated gamma
AT1G08590	Relocated gamma
AT1G08600	Relocated gamma
AT1G08610	Relocated gamma
AT1G08630	Relocated gamma
AT1G08650	Relocated gamma
AT1G08695	Transposed
AT1G08720	Relocated gamma
AT1G08730	Alpha WGD
AT1G08800	Relocated gamma
AT1G08820	Relocated gamma
AT1G08845	Relocated gamma
AT1G08880	Alpha WGD
AT1G08890	Beta WGD
AT1G08900	Beta WGD
AT1G08920	Beta WGD
AT1G08930	Beta WGD
AT1G08940	Beta WGD
AT1G08970	Alpha WGD
AT1G08980	Relocated gamma
AT1G08990	Alpha WGD
AT1G09000	Alpha WGD
AT1G09030	Relocated gamma
AT1G09040	Tandem
AT1G09050	Alpha WGD
AT1G09060	Relocated gamma
AT1G09070	Relocated gamma
AT1G09080	Relocated gamma
AT1G09090	Relocated gamma
AT1G09100	Beta WGD
AT1G09130	Relocated gamma
AT1G09155	Alpha WGD
AT1G09157	Transposed
AT1G09170	Beta WGD
AT1G09180	Alpha WGD
AT1G09190	Relocated gamma
AT1G09200	Transposed
AT1G09210	Alpha WGD
AT1G09240	Alpha WGD
AT1G09250	Beta WGD
AT1G09270	Beta WGD
AT1G09280	Relocated gamma
AT1G09300	Relocated gamma
AT1G09310	Alpha WGD
AT1G09340	Relocated gamma
AT1G09350	Alpha WGD
AT1G09360	Tandem
AT1G09370	Tandem
AT1G09380	Relocated gamma
AT1G09390	Alpha WGD
AT1G09400	Transposed
AT1G09410	Alpha WGD
AT1G09420	Relocated gamma
AT1G09440	Alpha WGD
AT1G09460	Relocated gamma
AT1G09470	Beta WGD
AT1G09480	Proximal
AT1G09483	Proximal
AT1G09490	Tandem
AT1G09500	Tandem
AT1G09510	Tandem
AT1G09520	Relocated gamma
AT1G09530	Relocated gamma
AT1G09540	Beta WGD
AT1G09550	Beta WGD
AT1G09560	Beta WGD
AT1G09570	Relocated gamma
AT1G09575	Alpha WGD
AT1G09580	Alpha WGD
AT1G09590	Alpha WGD
AT1G09600	Alpha WGD
AT1G09610	Relocated gamma
AT1G09630	Relocated gamma
AT1G09640	Alpha WGD
AT1G09645	Relocated gamma
AT1G09650	Transposed
AT1G09660	Relocated gamma
AT1G09665	Alpha WGD
AT1G09690	Alpha WGD
AT1G09700	Relocated gamma
AT1G09710	Alpha WGD
AT1G09720	Alpha WGD
AT1G09750	Relocated gamma
AT1G09790	Relocated gamma
AT1G09795	Alpha WGD
AT1G09810	Relocated gamma
AT1G09812	Relocated gamma
AT1G09840	Alpha WGD
AT1G09860	Alpha WGD
AT1G09880	Tandem
AT1G09890	Tandem
AT1G09900	Relocated gamma
AT1G09910	Proximal
AT1G09920	Relocated gamma
AT1G09930	Relocated gamma
AT1G09932	Tandem
AT1G09935	Tandem
AT1G09940	Alpha WGD
AT1G09950	Alpha WGD
AT1G09960	Relocated gamma
AT1G09970	Relocated gamma
AT1G09980	Alpha WGD
AT1G10000	Transposed
AT1G10010	Alpha WGD
AT1G10020	Relocated gamma
AT1G10040	Relocated gamma
AT1G10050	Alpha WGD
AT1G10060	Tandem
AT1G10070	Tandem
AT1G10080	Beta WGD
AT1G10090	Beta WGD
AT1G10100	Beta WGD
AT1G10110	Transposed
AT1G10120	Beta WGD
AT1G10140	Alpha WGD
AT1G10150	Alpha WGD
AT1G10160	Beta WGD
AT1G10190	Transposed
AT1G10210	Alpha WGD
AT1G10220	Alpha WGD
AT1G10230	Transposed
AT1G10240	Relocated gamma
AT1G10270	Relocated gamma
AT1G10280	Beta WGD
AT1G10290	Alpha WGD
AT1G10310	Relocated gamma
AT1G10320	Relocated gamma
AT1G10350	Alpha WGD
AT1G10360	Beta WGD
AT1G10370	Beta WGD
AT1G10380	Relocated gamma
AT1G10385	Relocated gamma
AT1G10390	Alpha WGD
AT1G10410	Alpha WGD
AT1G10430	Beta WGD
AT1G10450	Beta WGD
AT1G10455	Transposed
AT1G10460	Relocated gamma
AT1G10470	Alpha WGD
AT1G10510	Relocated gamma
AT1G10530	Alpha WGD
AT1G10540	Alpha WGD
AT1G10560	Alpha WGD
AT1G10570	Alpha WGD
AT1G10585	Tandem
AT1G10586	Tandem
AT1G10588	Relocated gamma
AT1G10590	Beta WGD
AT1G10600	Relocated gamma
AT1G10610	Relocated gamma
AT1G10620	Beta WGD
AT1G10630	Beta WGD
AT1G10640	Alpha WGD
AT1G10650	Alpha WGD
AT1G10657	Relocated gamma
AT1G10660	Relocated gamma
AT1G10670	Alpha WGD
AT1G10710	Tandem
AT1G10717	Tandem
AT1G10730	Alpha WGD
AT1G10740	Beta WGD
AT1G10745	Tandem
AT1G10747	Tandem
AT1G10750	Beta WGD
AT1G10760	Relocated gamma
AT1G10770	Beta WGD
AT1G10790	Relocated gamma
AT1G10810	Alpha WGD
AT1G10820	Alpha WGD
AT1G10850	Alpha WGD
AT1G10870	Alpha WGD
AT1G10900	Alpha WGD
AT1G10910	Relocated gamma
AT1G10920	Transposed
AT1G10930	Alpha WGD
AT1G10940	Alpha WGD
AT1G10950	Relocated gamma
AT1G10960	Alpha WGD
AT1G10970	Alpha WGD
AT1G10980	Transposed
AT1G11040	Relocated gamma
AT1G11050	Relocated gamma
AT1G11060	Alpha WGD
AT1G11070	Beta WGD
AT1G11080	Alpha WGD
AT1G11090	Relocated gamma
AT1G11100	Alpha WGD
AT1G11110	Alpha WGD
AT1G11120	Alpha WGD
AT1G11130	Relocated gamma
AT1G11160	Beta WGD
AT1G11170	Alpha WGD
AT1G11180	Alpha WGD
AT1G11190	Beta WGD
AT1G11200	Beta WGD
AT1G11210	Alpha WGD
AT1G11220	Tandem
AT1G11230	Tandem
AT1G11250	Alpha WGD
AT1G11260	Beta WGD
AT1G11280	Alpha WGD
AT1G11290	Beta WGD
AT1G11300	Beta WGD
AT1G11310	Alpha WGD
AT1G11330	Beta WGD
AT1G11340	Beta WGD
AT1G11350	Beta WGD
AT1G11362	Transposed
AT1G11390	Alpha WGD
AT1G11410	Beta WGD
AT1G11420	Transposed
AT1G11430	Relocated gamma
AT1G11450	Tandem
AT1G11460	Tandem
AT1G11475	Alpha WGD
AT1G11500	Beta WGD
AT1G11510	Alpha WGD
AT1G11520	Beta WGD
AT1G11540	Beta WGD
AT1G11545	Relocated gamma
AT1G11560	Alpha WGD
AT1G11580	Tandem
AT1G11590	Beta WGD
AT1G11593	Transposed
AT1G11600	Relocated gamma
AT1G11608	Proximal
AT1G11610	Transposed
AT1G11620	Proximal
AT1G11630	Alpha WGD
AT1G11655	Relocated gamma
AT1G11660	Relocated gamma
AT1G11670	Beta WGD
AT1G11700	Beta WGD
AT1G11710	Beta WGD
AT1G11730	Relocated gamma
AT1G11740	Alpha WGD
AT1G11790	Relocated gamma
AT1G11810	Transposed
AT1G11820	Relocated gamma
AT1G11840	Relocated gamma
AT1G11905	Relocated gamma
AT1G11910	Beta WGD
AT1G11915	Relocated gamma
AT1G11920	Beta WGD
AT1G11925	Relocated gamma
AT1G11930	Relocated gamma
AT1G11940	Relocated gamma
AT1G11950	Beta WGD
AT1G11960	Beta WGD
AT1G11990	Alpha WGD
AT1G12000	Beta WGD
AT1G12010	Alpha WGD
AT1G12020	Alpha WGD
AT1G12040	Alpha WGD
AT1G12070	Alpha WGD
AT1G12090	Beta WGD
AT1G12100	Beta WGD
AT1G12110	Relocated gamma
AT1G12120	Alpha WGD
AT1G12130	Alpha WGD
AT1G12140	Tandem
AT1G12160	Proximal
AT1G12170	Proximal
AT1G12190	Proximal
AT1G12200	Proximal
AT1G12210	Proximal
AT1G12220	Alpha WGD
AT1G12240	Alpha WGD
AT1G12250	Relocated gamma
AT1G12260	Alpha WGD
AT1G12270	Beta WGD
AT1G12280	Tandem
AT1G12290	Tandem
AT1G12300	Alpha WGD
AT1G12310	Alpha WGD
AT1G12320	Alpha WGD
AT1G12330	Relocated gamma
AT1G12340	Beta WGD
AT1G12350	Transposed
AT1G12360	Beta WGD
AT1G12380	Alpha WGD
AT1G12390	Beta WGD
AT1G12400	Relocated gamma
AT1G12410	Relocated gamma
AT1G12420	Beta WGD
AT1G12430	Relocated gamma
AT1G12440	Beta WGD
AT1G12450	Beta WGD
AT1G12460	Alpha WGD
AT1G12480	Relocated gamma
AT1G12490	Transposed
AT1G12520	Relocated gamma
AT1G12530	Relocated gamma
AT1G12540	Relocated gamma
AT1G12550	Relocated gamma
AT1G12560	Alpha WGD
AT1G12570	Relocated gamma
AT1G12580	Relocated gamma
AT1G12600	Beta WGD
AT1G12610	Alpha WGD
AT1G12620	Proximal
AT1G12630	Alpha WGD
AT1G12640	Alpha WGD
AT1G12660	Tandem
AT1G12663	Tandem
AT1G12665	Tandem
AT1G12672	Proximal
AT1G12700	Proximal
AT1G12710	Alpha WGD
AT1G12730	Alpha WGD
AT1G12740	Relocated gamma
AT1G12750	Beta WGD
AT1G12760	Beta WGD
AT1G12770	Relocated gamma
AT1G12775	Proximal
AT1G12780	Alpha WGD
AT1G12800	Relocated gamma
AT1G12820	Alpha WGD
AT1G12850	Alpha WGD
AT1G12855	Proximal
AT1G12860	Alpha WGD
AT1G12870	Proximal
AT1G12880	Alpha WGD
AT1G12890	Relocated gamma
AT1G12900	Alpha WGD
AT1G12910	Alpha WGD
AT1G12920	Alpha WGD
AT1G12930	Relocated gamma
AT1G12940	Relocated gamma
AT1G12950	Alpha WGD
AT1G12970	Alpha WGD
AT1G13000	Alpha WGD
AT1G13020	Alpha WGD
AT1G13050	Alpha WGD
AT1G13060	Alpha WGD
AT1G13070	Alpha WGD
AT1G13080	Tandem
AT1G13090	Tandem
AT1G13100	Tandem
AT1G13110	Tandem
AT1G13130	Alpha WGD
AT1G13140	Alpha WGD
AT1G13150	Tandem
AT1G13160	Relocated gamma
AT1G13170	Relocated gamma
AT1G13190	Relocated gamma
AT1G13195	Relocated gamma
AT1G13210	Alpha WGD
AT1G13230	Alpha WGD
AT1G13260	Alpha WGD
AT1G13270	Alpha WGD
AT1G13280	Alpha WGD
AT1G13290	Relocated gamma
AT1G13300	Alpha WGD
AT1G13320	Alpha WGD
AT1G13340	Relocated gamma
AT1G13350	Alpha WGD
AT1G13360	Relocated gamma
AT1G13370	Transposed
AT1G13380	Relocated gamma
AT1G13400	Relocated gamma
AT1G13410	Relocated gamma
AT1G13420	Tandem
AT1G13430	Tandem
AT1G13440	Relocated gamma
AT1G13450	Alpha WGD
AT1G13460	Alpha WGD
AT1G13470	Tandem
AT1G13480	Tandem
AT1G13490	Tandem
AT1G13500	Tandem
AT1G13510	Tandem
AT1G13520	Tandem
AT1G13530	Tandem
AT1G13540	Tandem
AT1G13550	Proximal
AT1G13560	Alpha WGD
AT1G13580	Alpha WGD
AT1G13600	Beta WGD
AT1G13610	Relocated gamma
AT1G13620	Alpha WGD
AT1G13635	Relocated gamma
AT1G13640	Beta WGD
AT1G13650	Relocated gamma
AT1G13680	Relocated gamma
AT1G13690	Relocated gamma
AT1G13730	Beta WGD
AT1G13740	Beta WGD
AT1G13790	Transposed
AT1G13830	Beta WGD
AT1G13860	Alpha WGD
AT1G13880	Beta WGD
AT1G13900	Alpha WGD
AT1G13920	Beta WGD
AT1G13930	Alpha WGD
AT1G13940	Beta WGD
AT1G13945	Alpha WGD
AT1G13950	Beta WGD
AT1G13960	Alpha WGD
AT1G13980	Relocated gamma
AT1G14000	Relocated gamma
AT1G14010	Beta WGD
AT1G14020	Alpha WGD
AT1G14030	Relocated gamma
AT1G14040	Beta WGD
AT1G14048	Relocated gamma
AT1G14060	Relocated gamma
AT1G14070	Alpha WGD
AT1G14080	Tandem
AT1G14100	Tandem
AT1G14110	Tandem
AT1G14120	Tandem
AT1G14130	Tandem
AT1G14140	Relocated gamma
AT1G14160	Relocated gamma
AT1G14170	Alpha WGD
AT1G14180	Relocated gamma
AT1G14185	Tandem
AT1G14190	Tandem
AT1G14200	Beta WGD
AT1G14205	Relocated gamma
AT1G14210	Beta WGD
AT1G14220	Beta WGD
AT1G14230	Alpha WGD
AT1G14240	Tandem
AT1G14250	Tandem
AT1G14260	Alpha WGD
AT1G14270	Relocated gamma
AT1G14280	Alpha WGD
AT1G14290	Beta WGD
AT1G14310	Relocated gamma
AT1G14315	Transposed
AT1G14320	Beta WGD
AT1G14330	Beta WGD
AT1G14340	Relocated gamma
AT1G14350	Alpha WGD
AT1G14360	Alpha WGD
AT1G14370	Beta WGD
AT1G14380	Alpha WGD
AT1G14390	Alpha WGD
AT1G14400	Alpha WGD
AT1G14410	Alpha WGD
AT1G14420	Alpha WGD
AT1G14430	Relocated gamma
AT1G14440	Alpha WGD
AT1G14450	Alpha WGD
AT1G14460	Alpha WGD
AT1G14470	Transposed
AT1G14480	Proximal
AT1G14500	Proximal
AT1G14510	Alpha WGD
AT1G14530	Alpha WGD
AT1G14540	Proximal
AT1G14550	Proximal
AT1G14570	Relocated gamma
AT1G14580	Alpha WGD
AT1G14590	Relocated gamma
AT1G14600	Alpha WGD
AT1G14630	Alpha WGD
AT1G14640	Proximal
AT1G14650	Proximal
AT1G14660	Alpha WGD
AT1G14670	Alpha WGD
AT1G14685	Beta WGD
AT1G14687	Relocated gamma
AT1G14690	Alpha WGD
AT1G14700	Beta WGD
AT1G14720	Alpha WGD
AT1G14770	Beta WGD
AT1G14780	Relocated gamma
AT1G14790	Relocated gamma
AT1G14800	Transposed
AT1G14820	Relocated gamma
AT1G14840	Beta WGD
AT1G14860	Alpha WGD
AT1G14870	Tandem
AT1G14880	Tandem
AT1G14890	Beta WGD
AT1G14910	Alpha WGD
AT1G14920	Alpha WGD
AT1G14930	Beta WGD
AT1G14940	Tandem
AT1G14950	Tandem
AT1G14960	Tandem
AT1G14970	Alpha WGD
AT1G14980	Beta WGD
AT1G15000	Relocated gamma
AT1G15010	Alpha WGD
AT1G15015	Transposed
AT1G15020	Alpha WGD
AT1G15030	Alpha WGD
AT1G15050	Alpha WGD
AT1G15060	Relocated gamma
AT1G15080	Alpha WGD
AT1G15100	Alpha WGD
AT1G15120	Alpha WGD
AT1G15125	Relocated gamma
AT1G15150	Tandem
AT1G15160	Tandem
AT1G15165	Transposed
AT1G15170	Tandem
AT1G15180	Tandem
AT1G15210	Relocated gamma
AT1G15215	Relocated gamma
AT1G15260	Relocated gamma
AT1G15280	Alpha WGD
AT1G15290	Relocated gamma
AT1G15300	Alpha WGD
AT1G15310	Relocated gamma
AT1G15330	Alpha WGD
AT1G15340	Beta WGD
AT1G15350	Beta WGD
AT1G15380	Alpha WGD
AT1G15390	Relocated gamma
AT1G15400	Alpha WGD
AT1G15430	Alpha WGD
AT1G15440	Relocated gamma
AT1G15460	Transposed
AT1G15470	Beta WGD
AT1G15480	Beta WGD
AT1G15490	Beta WGD
AT1G15500	Alpha WGD
AT1G15510	Relocated gamma
AT1G15520	Relocated gamma
AT1G15540	Beta WGD
AT1G15550	Alpha WGD
AT1G15560	Beta WGD
AT1G15570	Alpha WGD
AT1G15580	Beta WGD
AT1G15590	Alpha WGD
AT1G15600	Tandem
AT1G15610	Tandem
AT1G15620	Tandem
AT1G15630	Tandem
AT1G15640	Tandem
AT1G15670	Alpha WGD
AT1G15680	Transposed
AT1G15710	Relocated gamma
AT1G15720	Transposed
AT1G15730	Alpha WGD
AT1G15740	Relocated gamma
AT1G15750	Beta WGD
AT1G15760	Alpha WGD
AT1G15770	Proximal
AT1G15780	Tandem
AT1G15790	Tandem
AT1G15800	Alpha WGD
AT1G15810	Relocated gamma
AT1G15850	Alpha WGD
AT1G15860	Relocated gamma
AT1G15870	Alpha WGD
AT1G15880	Relocated gamma
AT1G15890	Relocated gamma
AT1G15910	Alpha WGD
AT1G15920	Alpha WGD
AT1G15930	Alpha WGD
AT1G15940	Alpha WGD
AT1G15950	Alpha WGD
AT1G15960	Alpha WGD
AT1G15970	Alpha WGD
AT1G15990	Relocated gamma
AT1G16000	Alpha WGD
AT1G16010	Alpha WGD
AT1G16020	Alpha WGD
AT1G16030	Transposed
AT1G16060	Alpha WGD
AT1G16090	Alpha WGD
AT1G16110	Tandem
AT1G16120	Tandem
AT1G16130	Tandem
AT1G16150	Tandem
AT1G16160	Tandem
AT1G16170	Alpha WGD
AT1G16180	Relocated gamma
AT1G16190	Alpha WGD
AT1G16220	Alpha WGD
AT1G16225	Tandem
AT1G16230	Alpha WGD
AT1G16240	Tandem
AT1G16260	Alpha WGD
AT1G16270	Alpha WGD
AT1G16280	Relocated gamma
AT1G16300	Alpha WGD
AT1G16310	Alpha WGD
AT1G16320	Alpha WGD
AT1G16330	Relocated gamma
AT1G16340	Alpha WGD
AT1G16350	Alpha WGD
AT1G16360	Alpha WGD
AT1G16370	Alpha WGD
AT1G16380	Alpha WGD
AT1G16390	Alpha WGD
AT1G16400	Alpha WGD
AT1G16410	Tandem
AT1G16420	Alpha WGD
AT1G16430	Relocated gamma
AT1G16440	Alpha WGD
AT1G16460	Alpha WGD
AT1G16470	Alpha WGD
AT1G16480	Relocated gamma
AT1G16490	Beta WGD
AT1G16500	Alpha WGD
AT1G16510	Beta WGD
AT1G16520	Beta WGD
AT1G16530	Relocated gamma
AT1G16540	Relocated gamma
AT1G16560	Relocated gamma
AT1G16610	Alpha WGD
AT1G16670	Beta WGD
AT1G16680	Alpha WGD
AT1G16690	Alpha WGD
AT1G16700	Alpha WGD
AT1G16705	Tandem
AT1G16710	Beta WGD
AT1G16750	Beta WGD
AT1G16760	Alpha WGD
AT1G16780	Alpha WGD
AT1G16800	Relocated gamma
AT1G16820	Alpha WGD
AT1G16830	Alpha WGD
AT1G16840	Alpha WGD
AT1G16860	Alpha WGD
AT1G16890	Alpha WGD
AT1G16900	Alpha WGD
AT1G16905	Relocated gamma
AT1G16910	Alpha WGD
AT1G16920	Relocated gamma
AT1G16930	Alpha WGD
AT1G16940	Relocated gamma
AT1G16960	Beta WGD
AT1G16980	Alpha WGD
AT1G17000	Tandem
AT1G17010	Alpha WGD
AT1G17020	Tandem
AT1G17030	Relocated gamma
AT1G17040	Alpha WGD
AT1G17050	Beta WGD
AT1G17060	Beta WGD
AT1G17080	Beta WGD
AT1G17100	Alpha WGD
AT1G17110	Beta WGD
AT1G17120	Relocated gamma
AT1G17130	Relocated gamma
AT1G17140	Alpha WGD
AT1G17145	Alpha WGD
AT1G17147	Relocated gamma
AT1G17150	Alpha WGD
AT1G17170	Alpha WGD
AT1G17180	Beta WGD
AT1G17190	Tandem
AT1G17200	Beta WGD
AT1G17210	Relocated gamma
AT1G17220	Relocated gamma
AT1G17240	Alpha WGD
AT1G17250	Tandem
AT1G17260	Relocated gamma
AT1G17270	Beta WGD
AT1G17280	Relocated gamma
AT1G17285	Proximal
AT1G17290	Alpha WGD
AT1G17300	Proximal
AT1G17310	Alpha WGD
AT1G17340	Relocated gamma
AT1G17345	Alpha WGD
AT1G17350	Alpha WGD
AT1G17360	Alpha WGD
AT1G17370	Beta WGD
AT1G17380	Alpha WGD
AT1G17400	Alpha WGD
AT1G17410	Relocated gamma
AT1G17420	Alpha WGD
AT1G17430	Alpha WGD
AT1G17440	Relocated gamma
AT1G17455	Alpha WGD
AT1G17460	Alpha WGD
AT1G17470	Alpha WGD
AT1G17480	Alpha WGD
AT1G17490	Alpha WGD
AT1G17500	Beta WGD
AT1G17520	Alpha WGD
AT1G17530	Alpha WGD
AT1G17540	Alpha WGD
AT1G17545	Alpha WGD
AT1G17550	Tandem
AT1G17580	Relocated gamma
AT1G17590	Beta WGD
AT1G17600	Alpha WGD
AT1G17610	Alpha WGD
AT1G17615	Alpha WGD
AT1G17620	Relocated gamma
AT1G17630	Relocated gamma
AT1G17640	Transposed
AT1G17650	Relocated gamma
AT1G17700	Beta WGD
AT1G17710	Alpha WGD
AT1G17720	Relocated gamma
AT1G17730	Alpha WGD
AT1G17750	Alpha WGD
AT1G17770	Alpha WGD
AT1G17780	Alpha WGD
AT1G17790	Alpha WGD
AT1G17800	Transposed
AT1G17810	Alpha WGD
AT1G17820	Alpha WGD
AT1G17830	Alpha WGD
AT1G17840	Transposed
AT1G17860	Alpha WGD
AT1G17880	Alpha WGD
AT1G17890	Alpha WGD
AT1G17910	Relocated gamma
AT1G17920	Alpha WGD
AT1G17940	Alpha WGD
AT1G17950	Alpha WGD
AT1G17970	Alpha WGD
AT1G17980	Relocated gamma
AT1G17990	Proximal
AT1G18000	Tandem
AT1G18010	Tandem
AT1G18020	Proximal
AT1G18030	Relocated gamma
AT1G18040	Alpha WGD
AT1G18050	Transposed
AT1G18070	Relocated gamma
AT1G18080	Relocated gamma
AT1G18090	Relocated gamma
AT1G18100	Relocated gamma
AT1G18130	Transposed
AT1G18140	Relocated gamma
AT1G18150	Alpha WGD
AT1G18160	Alpha WGD
AT1G18170	Alpha WGD
AT1G18180	Alpha WGD
AT1G18190	Relocated gamma
AT1G18200	Alpha WGD
AT1G18210	Alpha WGD
AT1G18250	Alpha WGD
AT1G18260	Alpha WGD
AT1G18270	Relocated gamma
AT1G18280	Alpha WGD
AT1G18300	Alpha WGD
AT1G18350	Alpha WGD
AT1G18360	Alpha WGD
AT1G18370	Relocated gamma
AT1G18400	Alpha WGD
AT1G18410	Alpha WGD
AT1G18420	Relocated gamma
AT1G18440	Relocated gamma
AT1G18450	Alpha WGD
AT1G18460	Alpha WGD
AT1G18470	Alpha WGD
AT1G18485	Transposed
AT1G18500	Alpha WGD
AT1G18540	Alpha WGD
AT1G18550	Relocated gamma
AT1G18560	Relocated gamma
AT1G18570	Beta WGD
AT1G18580	Relocated gamma
AT1G18590	Alpha WGD
AT1G18600	Alpha WGD
AT1G18610	Alpha WGD
AT1G18620	Alpha WGD
AT1G18630	Beta WGD
AT1G18650	Beta WGD
AT1G18670	Alpha WGD
AT1G18680	Relocated gamma
AT1G18690	Beta WGD
AT1G18710	Alpha WGD
AT1G18720	Alpha WGD
AT1G18740	Alpha WGD
AT1G18750	Alpha WGD
AT1G18760	Tandem
AT1G18770	Tandem
AT1G18780	Proximal
AT1G18790	Gamma WGD
AT1G18800	Alpha WGD
AT1G18835	Relocated gamma
AT1G18840	Alpha WGD
AT1G18860	Relocated gamma
AT1G18870	Alpha WGD
AT1G18880	Relocated gamma
AT1G18890	Alpha WGD
AT1G18900	Alpha WGD
AT1G18910	Alpha WGD
AT1G18920	Alpha WGD
AT1G18930	Gamma WGD
AT1G18940	Alpha WGD
AT1G18950	Relocated gamma
AT1G18960	Relocated gamma
AT1G18970	Alpha WGD
AT1G18980	Tandem
AT1G18990	Alpha WGD
AT1G19000	Alpha WGD
AT1G19010	Alpha WGD
AT1G19020	Relocated gamma
AT1G19030	Gamma WGD
AT1G19050	Alpha WGD
AT1G19060	Transposed
AT1G19070	Transposed
AT1G19080	Transposed
AT1G19100	Relocated gamma
AT1G19110	Relocated gamma
AT1G19120	Relocated gamma
AT1G19150	Relocated gamma
AT1G19160	Transposed
AT1G19170	Relocated gamma
AT1G19180	Alpha WGD
AT1G19200	Alpha WGD
AT1G19210	Alpha WGD
AT1G19220	Relocated gamma
AT1G19250	Relocated gamma
AT1G19260	Transposed
AT1G19270	Gamma WGD
AT1G19290	Relocated gamma
AT1G19300	Gamma WGD
AT1G19310	Gamma WGD
AT1G19320	Alpha WGD
AT1G19330	Alpha WGD
AT1G19350	Gamma WGD
AT1G19360	Alpha WGD
AT1G19370	Alpha WGD
AT1G19380	Gamma WGD
AT1G19400	Alpha WGD
AT1G19410	Transposed
AT1G19430	Gamma WGD
AT1G19440	Gamma WGD
AT1G19450	Alpha WGD
AT1G19460	Tandem
AT1G19470	Gamma WGD
AT1G19480	Gamma WGD
AT1G19510	Gamma WGD
AT1G19520	Relocated gamma
AT1G19540	Gamma WGD
AT1G19550	Alpha WGD
AT1G19570	Alpha WGD
AT1G19580	Gamma WGD
AT1G19600	Relocated gamma
AT1G19610	Relocated gamma
AT1G19630	Relocated gamma
AT1G19640	Gamma WGD
AT1G19650	Gamma WGD
AT1G19660	Alpha WGD
AT1G19680	Gamma WGD
AT1G19700	Gamma WGD
AT1G19710	Alpha WGD
AT1G19715	Relocated gamma
AT1G19720	Relocated gamma
AT1G19730	Gamma WGD
AT1G19740	Alpha WGD
AT1G19750	Transposed
AT1G19770	Alpha WGD
AT1G19780	Gamma WGD
AT1G19790	Gamma WGD
AT1G19830	Gamma WGD
AT1G19835	Gamma WGD
AT1G19840	Gamma WGD
AT1G19850	Relocated gamma
AT1G19860	Gamma WGD
AT1G19880	Relocated gamma
AT1G19890	Gamma WGD
AT1G19900	Alpha WGD
AT1G19910	Alpha WGD
AT1G19930	Gamma WGD
AT1G19940	Alpha WGD
AT1G19950	Alpha WGD
AT1G19970	Gamma WGD
AT1G19990	Relocated gamma
AT1G20000	Transposed
AT1G20010	Alpha WGD
AT1G20020	Gamma WGD
AT1G20030	Gamma WGD
AT1G20060	Relocated gamma
AT1G20065	Transposed
AT1G20080	Gamma WGD
AT1G20090	Gamma WGD
AT1G20100	Alpha WGD
AT1G20110	Relocated gamma
AT1G20120	Alpha WGD
AT1G20130	Tandem
AT1G20132	Tandem
AT1G20135	Relocated gamma
AT1G20140	Alpha WGD
AT1G20150	Tandem
AT1G20160	Tandem
AT1G20180	Relocated gamma
AT1G20190	Relocated gamma
AT1G20200	Alpha WGD
AT1G20220	Alpha WGD
AT1G20230	Gamma WGD
AT1G20240	Proximal
AT1G20260	Gamma WGD
AT1G20270	Gamma WGD
AT1G20280	Transposed
AT1G20290	Proximal
AT1G20310	Alpha WGD
AT1G20330	Alpha WGD
AT1G20340	Alpha WGD
AT1G20360	Transposed
AT1G20370	Alpha WGD
AT1G20380	Alpha WGD
AT1G20400	Transposed
AT1G20440	Alpha WGD
AT1G20450	Tandem
AT1G20460	Alpha WGD
AT1G20470	Alpha WGD
AT1G20480	Tandem
AT1G20490	Tandem
AT1G20500	Tandem
AT1G20510	Tandem
AT1G20520	Gamma WGD
AT1G20530	Gamma WGD
AT1G20540	Gamma WGD
AT1G20550	Gamma WGD
AT1G20560	Gamma WGD
AT1G20570	Transposed
AT1G20580	Alpha WGD
AT1G20590	Gamma WGD
AT1G20610	Gamma WGD
AT1G20620	Gamma WGD
AT1G20630	Gamma WGD
AT1G20640	Gamma WGD
AT1G20650	Alpha WGD
AT1G20670	Alpha WGD
AT1G20680	Gamma WGD
AT1G20690	Proximal
AT1G20693	Gamma WGD
AT1G20696	Gamma WGD
AT1G20700	Gamma WGD
AT1G20710	Gamma WGD
AT1G20720	Proximal
AT1G20730	Proximal
AT1G20735	Proximal
AT1G20740	Gamma WGD
AT1G20750	Proximal
AT1G20780	Alpha WGD
AT1G20790	Tandem
AT1G20795	Tandem
AT1G20800	Tandem
AT1G20810	Relocated gamma
AT1G20816	Alpha WGD
AT1G20823	Gamma WGD
AT1G20840	Gamma WGD
AT1G20850	Gamma WGD
AT1G20860	Alpha WGD
AT1G20870	Alpha WGD
AT1G20880	Alpha WGD
AT1G20890	Alpha WGD
AT1G20900	Gamma WGD
AT1G20910	Gamma WGD
AT1G20920	Relocated gamma
AT1G20930	Alpha WGD
AT1G20940	Transposed
AT1G20950	Alpha WGD
AT1G20980	Alpha WGD
AT1G20990	Relocated gamma
AT1G21000	Alpha WGD
AT1G21010	Gamma WGD
AT1G21050	Gamma WGD
AT1G21060	Gamma WGD
AT1G21070	Gamma WGD
AT1G21080	Gamma WGD
AT1G21100	Tandem
AT1G21110	Alpha WGD
AT1G21120	Tandem
AT1G21130	Tandem
AT1G21140	Alpha WGD
AT1G21150	Relocated gamma
AT1G21160	Alpha WGD
AT1G21170	Alpha WGD
AT1G21190	Alpha WGD
AT1G21200	Alpha WGD
AT1G21210	Tandem
AT1G21230	Tandem
AT1G21240	Tandem
AT1G21245	Tandem
AT1G21250	Tandem
AT1G21270	Tandem
AT1G21320	Alpha WGD
AT1G21326	Proximal
AT1G21340	Relocated gamma
AT1G21360	Relocated gamma
AT1G21380	Alpha WGD
AT1G21390	Alpha WGD
AT1G21400	Relocated gamma
AT1G21410	Alpha WGD
AT1G21430	Relocated gamma
AT1G21440	Alpha WGD
AT1G21450	Relocated gamma
AT1G21460	Relocated gamma
AT1G21480	Relocated gamma
AT1G21530	Alpha WGD
AT1G21540	Tandem
AT1G21550	Relocated gamma
AT1G21560	Relocated gamma
AT1G21590	Alpha WGD
AT1G21610	Alpha WGD
AT1G21620	Transposed
AT1G21640	Relocated gamma
AT1G21650	Tandem
AT1G21651	Tandem
AT1G21660	Relocated gamma
AT1G21670	Tandem
AT1G21680	Tandem
AT1G21690	Relocated gamma
AT1G21700	Relocated gamma
AT1G21720	Alpha WGD
AT1G21722	Relocated gamma
AT1G21730	Relocated gamma
AT1G21740	Alpha WGD
AT1G21750	Alpha WGD
AT1G21770	Alpha WGD
AT1G21780	Relocated gamma
AT1G21810	Alpha WGD
AT1G21830	Relocated gamma
AT1G21850	Tandem
AT1G21860	Tandem
AT1G21864	Tandem
AT1G21866	Tandem
AT1G21870	Alpha WGD
AT1G21880	Gamma WGD
AT1G21890	Relocated gamma
AT1G21900	Relocated gamma
AT1G21910	Alpha WGD
AT1G21920	Alpha WGD
AT1G21925	Tandem
AT1G21928	Tandem
AT1G21930	Relocated gamma
AT1G21940	Tandem
AT1G21950	Tandem
AT1G21960	Transposed
AT1G21980	Alpha WGD
AT1G21990	Relocated gamma
AT1G22000	Proximal
AT1G22015	Alpha WGD
AT1G22020	Relocated gamma
AT1G22030	Relocated gamma
AT1G22050	Alpha WGD
AT1G22060	Proximal
AT1G22065	Alpha WGD
AT1G22070	Alpha WGD
AT1G22080	Transposed
AT1G22090	Transposed
AT1G22110	Relocated gamma
AT1G22130	Alpha WGD
AT1G22150	Alpha WGD
AT1G22160	Alpha WGD
AT1G22170	Alpha WGD
AT1G22190	Alpha WGD
AT1G22200	Relocated gamma
AT1G22210	Alpha WGD
AT1G22220	Alpha WGD
AT1G22230	Alpha WGD
AT1G22240	Alpha WGD
AT1G22250	Alpha WGD
AT1G22260	Proximal
AT1G22270	Alpha WGD
AT1G22275	Proximal
AT1G22280	Beta WGD
AT1G22290	Beta WGD
AT1G22300	Beta WGD
AT1G22330	Alpha WGD
AT1G22340	Alpha WGD
AT1G22360	Tandem
AT1G22370	Tandem
AT1G22380	Tandem
AT1G22400	Tandem
AT1G22410	Relocated gamma
AT1G22430	Tandem
AT1G22440	Tandem
AT1G22450	Relocated gamma
AT1G22470	Alpha WGD
AT1G22480	Alpha WGD
AT1G22490	Alpha WGD
AT1G22500	Beta WGD
AT1G22510	Alpha WGD
AT1G22520	Alpha WGD
AT1G22530	Beta WGD
AT1G22540	Alpha WGD
AT1G22550	Tandem
AT1G22570	Tandem
AT1G22600	Alpha WGD
AT1G22610	Relocated gamma
AT1G22620	Relocated gamma
AT1G22640	Beta WGD
AT1G22650	Beta WGD
AT1G22670	Beta WGD
AT1G22680	Alpha WGD
AT1G22690	Beta WGD
AT1G22710	Alpha WGD
AT1G22730	Relocated gamma
AT1G22740	Beta WGD
AT1G22760	Alpha WGD
AT1G22780	Beta WGD
AT1G22790	Beta WGD
AT1G22810	Beta WGD
AT1G22830	Alpha WGD
AT1G22840	Beta WGD
AT1G22870	Alpha WGD
AT1G22880	Beta WGD
AT1G22920	Alpha WGD
AT1G22950	Relocated gamma
AT1G22970	Alpha WGD
AT1G22980	Tandem
AT1G22985	Alpha WGD
AT1G22990	Alpha WGD
AT1G23000	Relocated gamma
AT1G23010	Alpha WGD
AT1G23020	Transposed
AT1G23030	Alpha WGD
AT1G23040	Alpha WGD
AT1G23060	Alpha WGD
AT1G23070	Transposed
AT1G23080	Beta WGD
AT1G23090	Relocated gamma
AT1G23100	Beta WGD
AT1G23110	Alpha WGD
AT1G23120	Beta WGD
AT1G23140	Alpha WGD
AT1G23145	Tandem
AT1G23147	Tandem
AT1G23149	Transposed
AT1G23150	Alpha WGD
AT1G23170	Alpha WGD
AT1G23190	Alpha WGD
AT1G23200	Relocated gamma
AT1G23201	Transposed
AT1G23205	Beta WGD
AT1G23210	Alpha WGD
AT1G23240	Alpha WGD
AT1G23250	Tandem
AT1G23290	Alpha WGD
AT1G23300	Relocated gamma
AT1G23310	Alpha WGD
AT1G23320	Alpha WGD
AT1G23330	Beta WGD
AT1G23340	Beta WGD
AT1G23350	Beta WGD
AT1G23360	Relocated gamma
AT1G23380	Alpha WGD
AT1G23390	Relocated gamma
AT1G23400	Relocated gamma
AT1G23420	Relocated gamma
AT1G23440	Relocated gamma
AT1G23450	Gamma WGD
AT1G23460	Gamma WGD
AT1G23465	Transposed
AT1G23470	Gamma WGD
AT1G23480	Transposed
AT1G23490	Beta WGD
AT1G23510	Tandem
AT1G23520	Tandem
AT1G23530	Alpha WGD
AT1G23540	Beta WGD
AT1G23550	Alpha WGD
AT1G23560	Alpha WGD
AT1G23570	Tandem
AT1G23580	Tandem
AT1G23590	Tandem
AT1G23600	Tandem
AT1G23610	Tandem
AT1G23640	Tandem
AT1G23660	Tandem
AT1G23670	Tandem
AT1G23690	Proximal
AT1G23700	Gamma WGD
AT1G23710	Alpha WGD
AT1G23730	Gamma WGD
AT1G23740	Relocated gamma
AT1G23750	Beta WGD
AT1G23760	Beta WGD
AT1G23770	Alpha WGD
AT1G23780	Tandem
AT1G23790	Alpha WGD
AT1G23800	Relocated gamma
AT1G23820	Alpha WGD
AT1G23830	Tandem
AT1G23840	Tandem
AT1G23850	Tandem
AT1G23870	Beta WGD
AT1G23880	Gamma WGD
AT1G23890	Gamma WGD
AT1G23900	Beta WGD
AT1G23910	Proximal
AT1G23930	Gamma WGD
AT1G23935	Transposed
AT1G23940	Beta WGD
AT1G23950	Tandem
AT1G23960	Tandem
AT1G23970	Proximal
AT1G23980	Gamma WGD
AT1G23990	Gamma WGD
AT1G24000	Tandem
AT1G24010	Tandem
AT1G24020	Proximal
AT1G24030	Relocated gamma
AT1G24050	Alpha WGD
AT1G24062	Transposed
AT1G24070	Gamma WGD
AT1G24090	Gamma WGD
AT1G24095	Transposed
AT1G24110	Gamma WGD
AT1G24120	Gamma WGD
AT1G24130	Gamma WGD
AT1G24140	Beta WGD
AT1G24147	Tandem
AT1G24148	Tandem
AT1G24150	Beta WGD
AT1G24155	Alpha WGD
AT1G24160	Gamma WGD
AT1G24170	Gamma WGD
AT1G24180	Beta WGD
AT1G24190	Gamma WGD
AT1G24200	Beta WGD
AT1G24210	Proximal
AT1G24220	Tandem
AT1G24230	Tandem
AT1G24240	Transposed
AT1G24250	Proximal
AT1G24256	Transposed
AT1G24260	Gamma WGD
AT1G24265	Tandem
AT1G24267	Tandem
AT1G24280	Gamma WGD
AT1G24300	Transposed
AT1G24320	Alpha WGD
AT1G24330	Alpha WGD
AT1G24350	Alpha WGD
AT1G24360	Relocated gamma
AT1G24380	Transposed
AT1G24388	Transposed
AT1G24400	Gamma WGD
AT1G24420	Tandem
AT1G24430	Tandem
AT1G24440	Relocated gamma
AT1G24470	Alpha WGD
AT1G24480	Relocated gamma
AT1G24490	Relocated gamma
AT1G24510	Gamma WGD
AT1G24530	Relocated gamma
AT1G24560	Relocated gamma
AT1G24580	Relocated gamma
AT1G24583	Alpha WGD
AT1G24590	Relocated gamma
AT1G24600	Alpha WGD
AT1G24620	Beta WGD
AT1G24625	Beta WGD
AT1G24650	Beta WGD
AT1G24735	Alpha WGD
AT1G24764	Beta WGD
AT1G24793	Proximal
AT1G24800	Proximal
AT1G24807	Proximal
AT1G24822	Proximal
AT1G24851	Gamma WGD
AT1G24880	Proximal
AT1G24881	Proximal
AT1G24909	Proximal
AT1G24996	Proximal
AT1G25025	Gamma WGD
AT1G25054	Proximal
AT1G25055	Proximal
AT1G25083	Proximal
AT1G25097	Proximal
AT1G25112	Gamma WGD
AT1G25141	Transposed
AT1G25145	Proximal
AT1G25150	Proximal
AT1G25155	Proximal
AT1G25180	Gamma WGD
AT1G25210	Proximal
AT1G25211	Proximal
AT1G25220	Gamma WGD
AT1G25230	Beta WGD
AT1G25240	Beta WGD
AT1G25250	Beta WGD
AT1G25270	Alpha WGD
AT1G25290	Beta WGD
AT1G25300	Beta WGD
AT1G25320	Gamma WGD
AT1G25330	Relocated gamma
AT1G25340	Gamma WGD
AT1G25350	Relocated gamma
AT1G25360	Gamma WGD
AT1G25365	Alpha WGD
AT1G25370	Alpha WGD
AT1G25380	Relocated gamma
AT1G25390	Gamma WGD
AT1G25400	Alpha WGD
AT1G25410	Alpha WGD
AT1G25420	Relocated gamma
AT1G25422	Relocated gamma
AT1G25430	Beta WGD
AT1G25440	Gamma WGD
AT1G25450	Alpha WGD
AT1G25460	Alpha WGD
AT1G25470	Alpha WGD
AT1G25472	Relocated gamma
AT1G25480	Alpha WGD
AT1G25500	Relocated gamma
AT1G25510	Relocated gamma
AT1G25520	Beta WGD
AT1G25530	Gamma WGD
AT1G25550	Alpha WGD
AT1G25560	Alpha WGD
AT1G25570	Relocated gamma
AT1G25580	Gamma WGD
AT1G25682	Tandem
AT1G25784	Gamma WGD
AT1G25886	Beta WGD
AT1G25988	Tandem
AT1G26100	Beta WGD
AT1G26120	Gamma WGD
AT1G26130	Gamma WGD
AT1G26140	Alpha WGD
AT1G26150	Beta WGD
AT1G26160	Gamma WGD
AT1G26170	Relocated gamma
AT1G26190	Gamma WGD
AT1G26200	Relocated gamma
AT1G26210	Alpha WGD
AT1G26220	Relocated gamma
AT1G26230	Relocated gamma
AT1G26260	Alpha WGD
AT1G26270	Beta WGD
AT1G26300	Alpha WGD
AT1G26310	Gamma WGD
AT1G26320	Beta WGD
AT1G26340	Relocated gamma
AT1G26355	Alpha WGD
AT1G26360	Gamma WGD
AT1G26370	Relocated gamma
AT1G26380	Tandem
AT1G26390	Tandem
AT1G26400	Tandem
AT1G26410	Tandem
AT1G26420	Tandem
AT1G26440	Beta WGD
AT1G26450	Beta WGD
AT1G26460	Gamma WGD
AT1G26500	Gamma WGD
AT1G26510	Gamma WGD
AT1G26515	Tandem
AT1G26530	Transposed
AT1G26540	Transposed
AT1G26560	Relocated gamma
AT1G26570	Relocated gamma
AT1G26580	Beta WGD
AT1G26590	Proximal
AT1G26600	Alpha WGD
AT1G26610	Proximal
AT1G26620	Beta WGD
AT1G26630	Beta WGD
AT1G26650	Alpha WGD
AT1G26665	Transposed
AT1G26670	Gamma WGD
AT1G26690	Gamma WGD
AT1G26710	Tandem
AT1G26720	Tandem
AT1G26730	Gamma WGD
AT1G26740	Relocated gamma
AT1G26770	Gamma WGD
AT1G26780	Gamma WGD
AT1G26790	Gamma WGD
AT1G26795	Tandem
AT1G26796	Tandem
AT1G26797	Tandem
AT1G26798	Tandem
AT1G26799	Tandem
AT1G26800	Beta WGD
AT1G26810	Relocated gamma
AT1G26820	Beta WGD
AT1G26830	Beta WGD
AT1G26840	Alpha WGD
AT1G26850	Relocated gamma
AT1G26870	Gamma WGD
AT1G26880	Gamma WGD
AT1G26890	Transposed
AT1G26900	Relocated gamma
AT1G26910	Beta WGD
AT1G26915	Alpha WGD
AT1G26920	Alpha WGD
AT1G26930	Gamma WGD
AT1G26940	Relocated gamma
AT1G26945	Relocated gamma
AT1G26950	Gamma WGD
AT1G26960	Gamma WGD
AT1G26970	Beta WGD
AT1G27000	Beta WGD
AT1G27020	Tandem
AT1G27030	Tandem
AT1G27040	Beta WGD
AT1G27045	Transposed
AT1G27060	Relocated gamma
AT1G27070	Gamma WGD
AT1G27080	Alpha WGD
AT1G27090	Relocated gamma
AT1G27100	Gamma WGD
AT1G27110	Proximal
AT1G27120	Relocated gamma
AT1G27130	Beta WGD
AT1G27135	Transposed
AT1G27140	Proximal
AT1G27150	Proximal
AT1G27170	Tandem
AT1G27180	Tandem
AT1G27190	Gamma WGD
AT1G27200	Gamma WGD
AT1G27210	Beta WGD
AT1G27220	Gamma WGD
AT1G27240	Proximal
AT1G27250	Gamma WGD
AT1G27260	Tandem
AT1G27270	Tandem
AT1G27280	Tandem
AT1G27310	Relocated gamma
AT1G27320	Relocated gamma
AT1G27330	Proximal
AT1G27340	Relocated gamma
AT1G27350	Proximal
AT1G27360	Tandem
AT1G27370	Tandem
AT1G27410	Transposed
AT1G27430	Transposed
AT1G27540	Tandem
AT1G27550	Tandem
AT1G27570	Proximal
AT1G27580	Proximal
AT1G27590	Proximal
AT1G27595	Transposed
AT1G27680	Transposed
AT1G27690	Relocated gamma
AT1G27720	Relocated gamma
AT1G27730	Relocated gamma
AT1G27740	Relocated gamma
AT1G27770	Relocated gamma
AT1G27820	Proximal
AT1G27840	Relocated gamma
AT1G27850	Relocated gamma
AT1G27860	Transposed
AT1G27870	Transposed
AT1G27880	Relocated gamma
[truncated: 16,827 more rows]
